# Supplementary material for: Exploring the inhibitory mechanism of piceatannol on α-glucosidase relevant to diabetes mellitus
Source: Royal Society of Chemistry journal article supplement (doi:10.1039/c9ra09028b), 2020-01-01
Supplement: c9ra09028b2.pdf [file c9ra09028b2.pdf]

1 Supplementary figure 1 3D structure of  $\alpha$ -glucosidase and a summary of the  
2 homology modelling parameters.

3 Supplementary figure 2 Ramachandran plot of KIT model by PROCHECK. 91.3%  
4 residues in favorable regions (Red); 8.5% residues in additional allowed regions  
5 (Yellow); 0.1% residues in generously allowed regions (Brown); 0.1% residues in  
6 disallowed regions (White).

7 Supplementary figure 3 The corresponding surface structure of enzyme-substrate  
8 complex with piceatannol. The blue one is *p*NPG (Substrate); The green one is  
9 piceatannol (Inhibitor).

10 Supplementary figure 4 2D interaction diagram of enzyme-substrate complex with  
11 *p*NPG (H-bonds are represented as green dotted line)

12

13

14

1 Supplementary figure 1

2

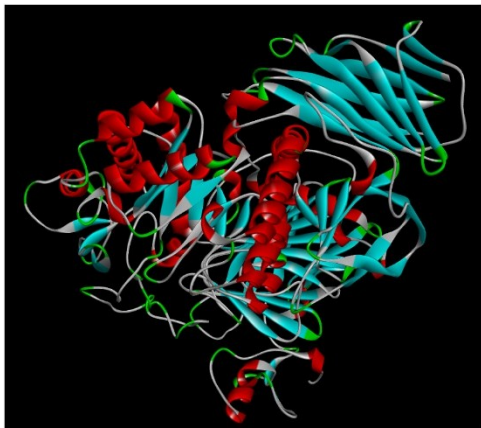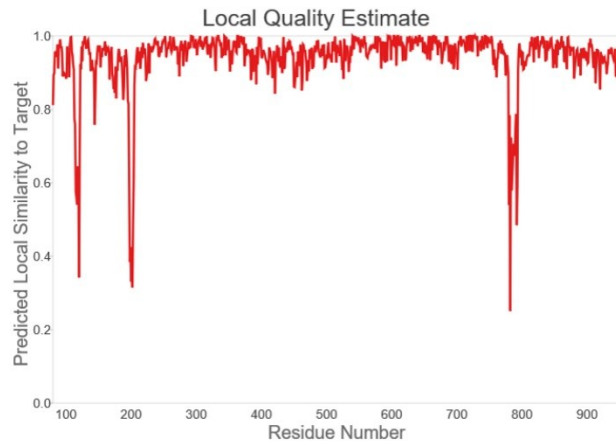

Z-score

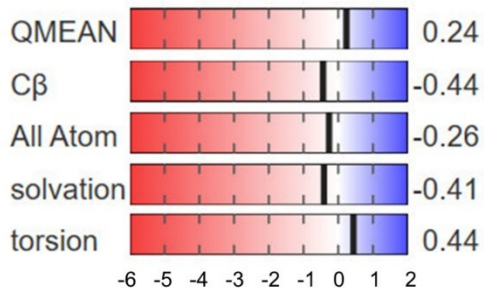

3

4

5

1 Supplementary figure 2

2

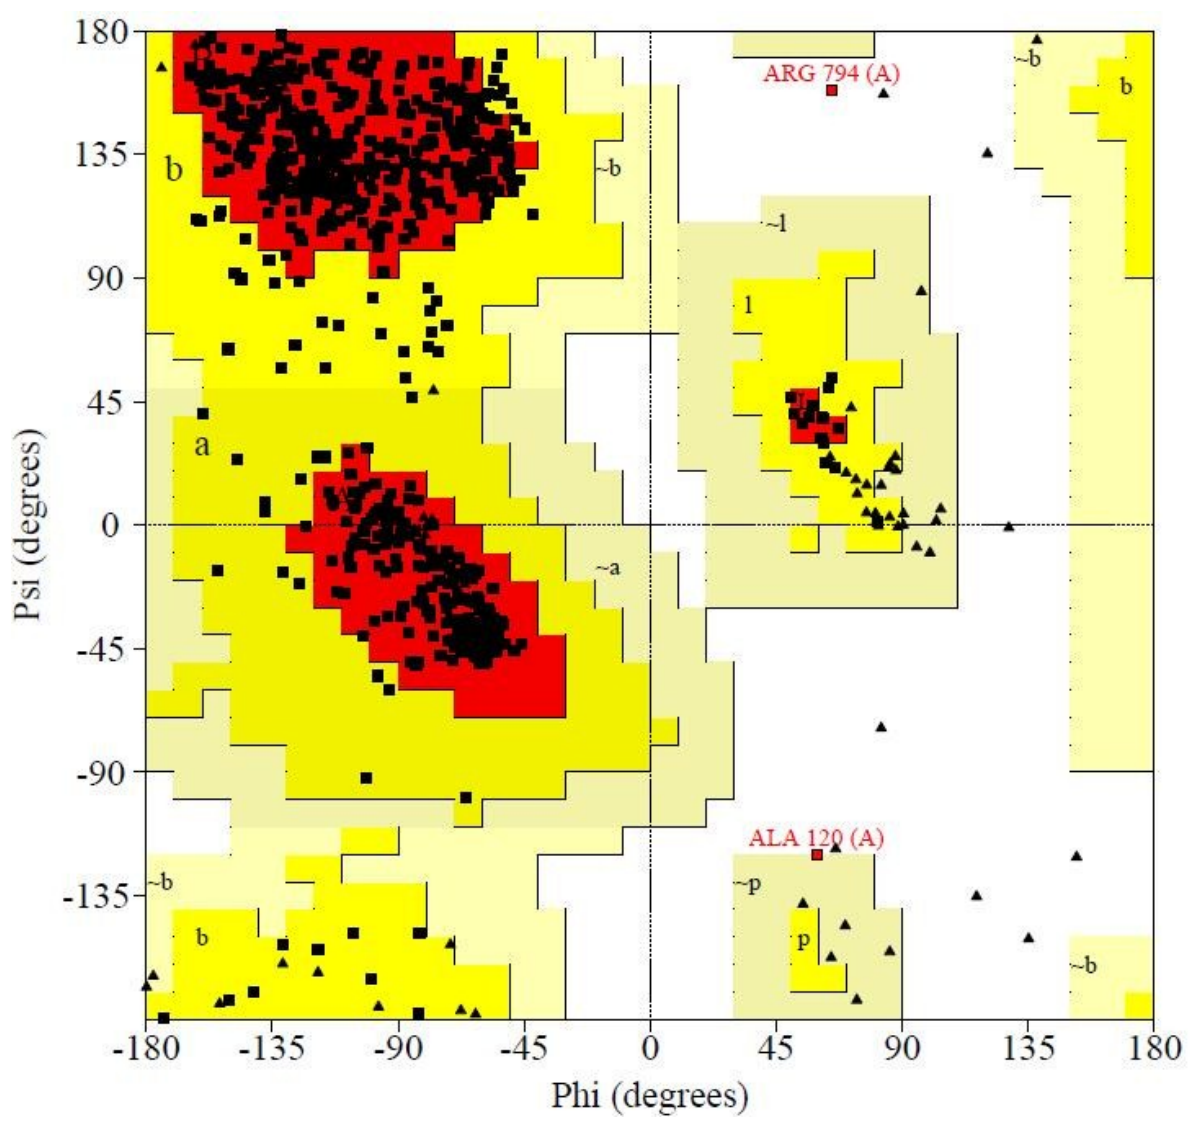

3

4

5

1 Supplementary figure 3

2

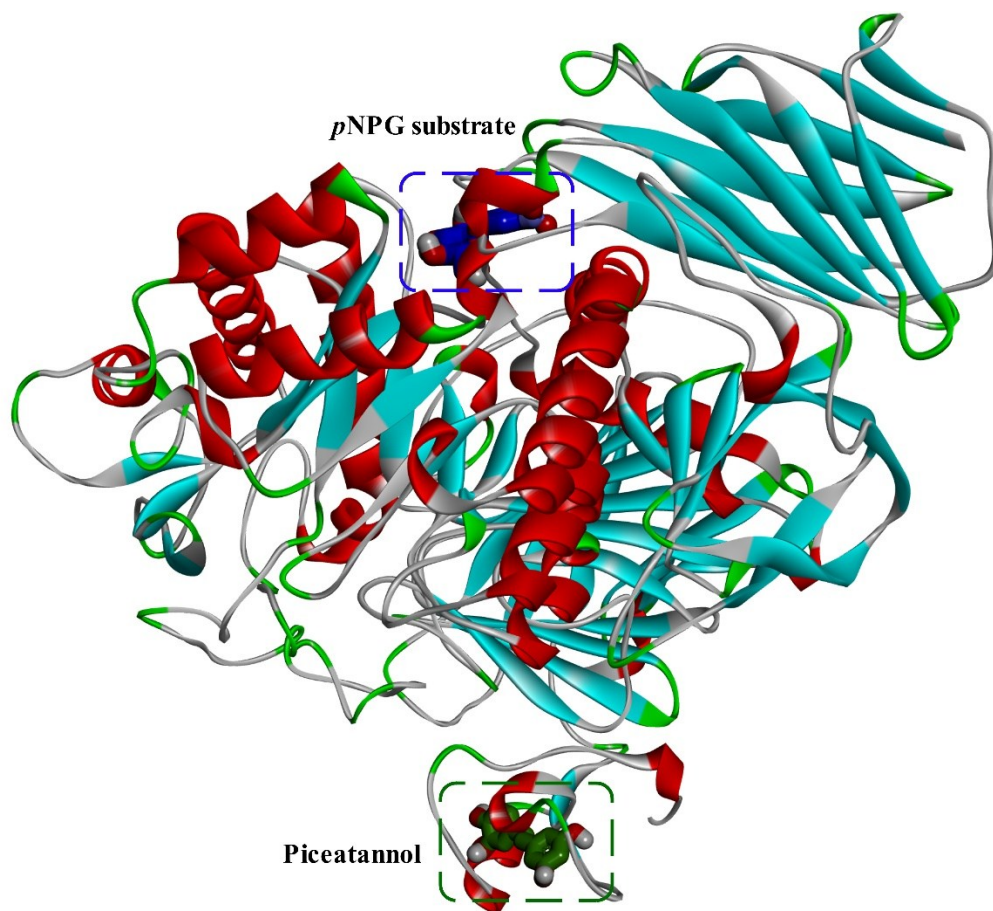

3

4

5

6

7

8

9

10

11

12

13

14

15

1 Supplementary figure 4

2

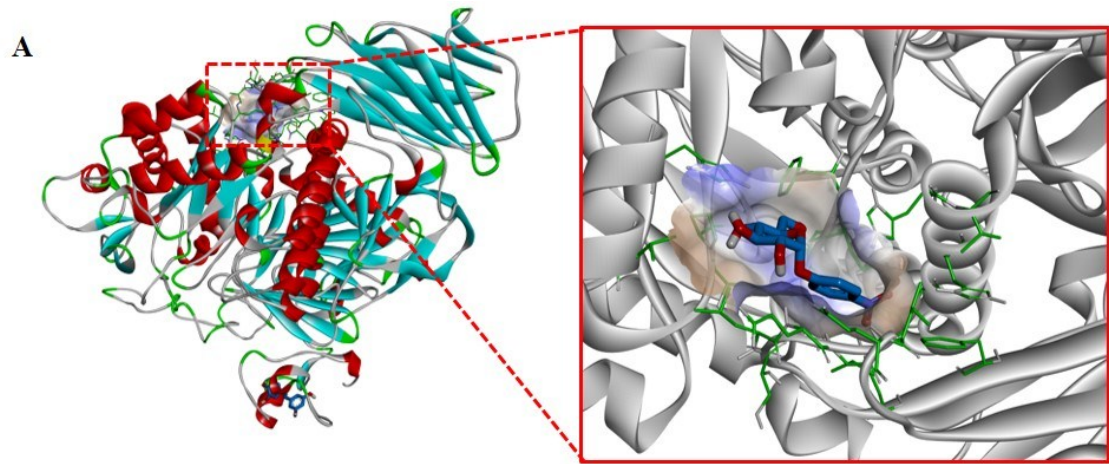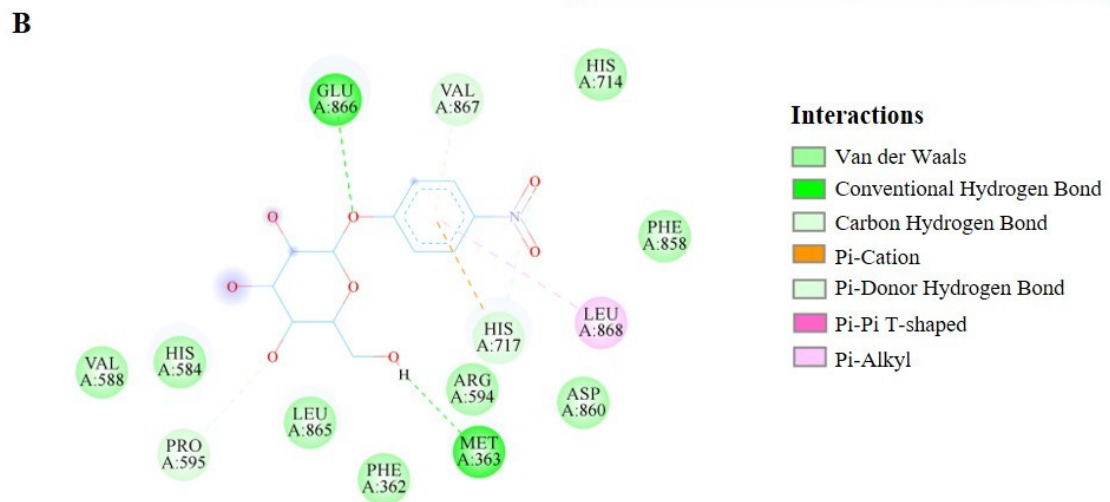

3

4

5
